# Supplementary material for: Comprehensive Profiling of Mammalian Tribbles Interactomes Implicates TRIB3 in Gene Repression
Source: MDPI journal article supplement (doi:10.3390/cancers13246318), 2021-12-16

## Supplementary Figure S1

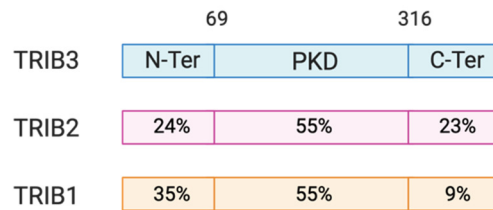

Supplementary Figure S1: Comparison of human TRIB1/2 and 3 protein sequence using ClustalOmega software.

## Supplementary Figure S2

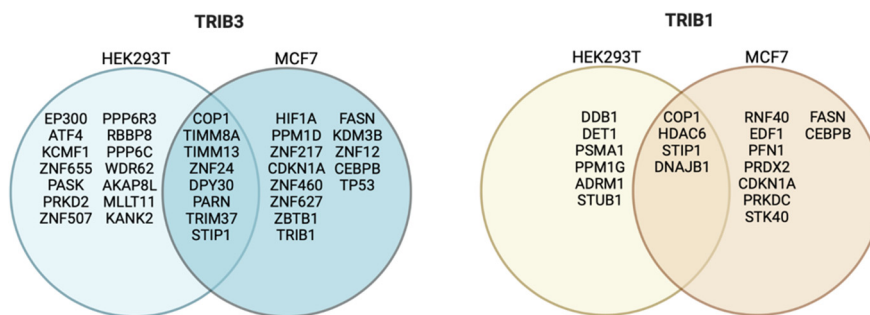

Supplementary Figure S2: Comparison of TRIB1 and TRIB3 interactors in HEK293T and MCF7 cells.

## File S1: TRAIN Consortium Authorship:

| Surname        | First Name    | Institution                                                     |
|----------------|---------------|-----------------------------------------------------------------|
| Bhutia         | Kunzangla     | Instituto de Investigacion Santaria, Hospital Clinico SanCarlos |
| Brouard        | Sophie        | University of Nantes                                            |
| Barril         | Xavier        | University of Barcelona                                         |
| Carracedo      | Arkaitz       | Asociación Centro de Investigación Cooperativa en Biociencias   |
| Castillo Lluva | Sonia         | Instituto de Investigacion Santaria, Hospital Clinico SanCarlos |
| Danger         | Richard A.E.D | University of Nantes                                            |

|                  |            |                                                                  |
|------------------|------------|------------------------------------------------------------------|
| Day              | Jack       | Instituto de Investigacion Santaria, Hospital Clinico SanCarlos  |
| Deshmukh         | Sumeet R   | The University of Sheffield                                      |
| Feseha           | Yodit      | University of Nantes                                             |
| Francis          | Sheila     | The University of Sheffield                                      |
| Grzesik          | Dominika J | William Harvey Research Institute, Queen Mary University, London |
| Hernandez Quiles | Miguel     | Universitair Medisch Centrum Utrecht                             |
| Kalkhoven        | Eric       | Universitair Medisch Centrum Utrecht                             |
| Kiss-Toth        | Endre      | The University of Sheffield                                      |

|                    |             |                                                                    |
|--------------------|-------------|--------------------------------------------------------------------|
| Linford            | Adam J      | Institute for Diabetes and Cancer (IDC), Helmholtz Zentrum München |
| Martinez Campesino | Laura       | The University of Sheffield                                        |
| Metherall          | Louise A    | William Harvey Research Institute, Queen Mary University, London   |
| Morris             | Imogen      | Universitair Medisch Centrum Utrecht                               |
| Niespolo           | Chiara      | The University of Sheffield                                        |
| Pellegata          | Natalia S   | Institute for Diabetes and Cancer (IDC), Helmholtz Zentrum München |
| Ruiz Cantos        | Miriam      | William Harvey Research Institute, Queen Mary University, London   |
| Salamanca Vilorio  | Juan        | University of Barcelona                                            |
| Satam              | Swapna S    | Institute for Diabetes and Cancer (IDC), Helmholtz Zentrum München |
| Scheideler         | Marcel J.C. | Institute for Diabetes and Cancer (IDC), Helmholtz Zentrum München |

|                  |           |                                                                     |
|------------------|-----------|---------------------------------------------------------------------|
| Shahrouzi        | Parastoo  | Asociación Centro de Investigación<br>Cooperativa en Biociencias    |
| Shologu          | Ziyanda   | Universidade da Beira Interior                                      |
| Shoulders        | Carol C   | William Harvey Research Institute, Queen<br>Mary University, London |
| Sudbery          | Ian       | The University of Sheffield                                         |
| Socorro          | Silvia    | Universidade da Beira Interior                                      |
| Velasco          | Guillermo | Instituto de Investigacion Santaria, Hospital<br>Clinico SanCarlos  |
| Villacanas Perez | Oscar     | MindtheByte Ltd                                                     |
| Wilson           | Heather   | The University of Sheffield                                         |

File S2: Original Western blot figures

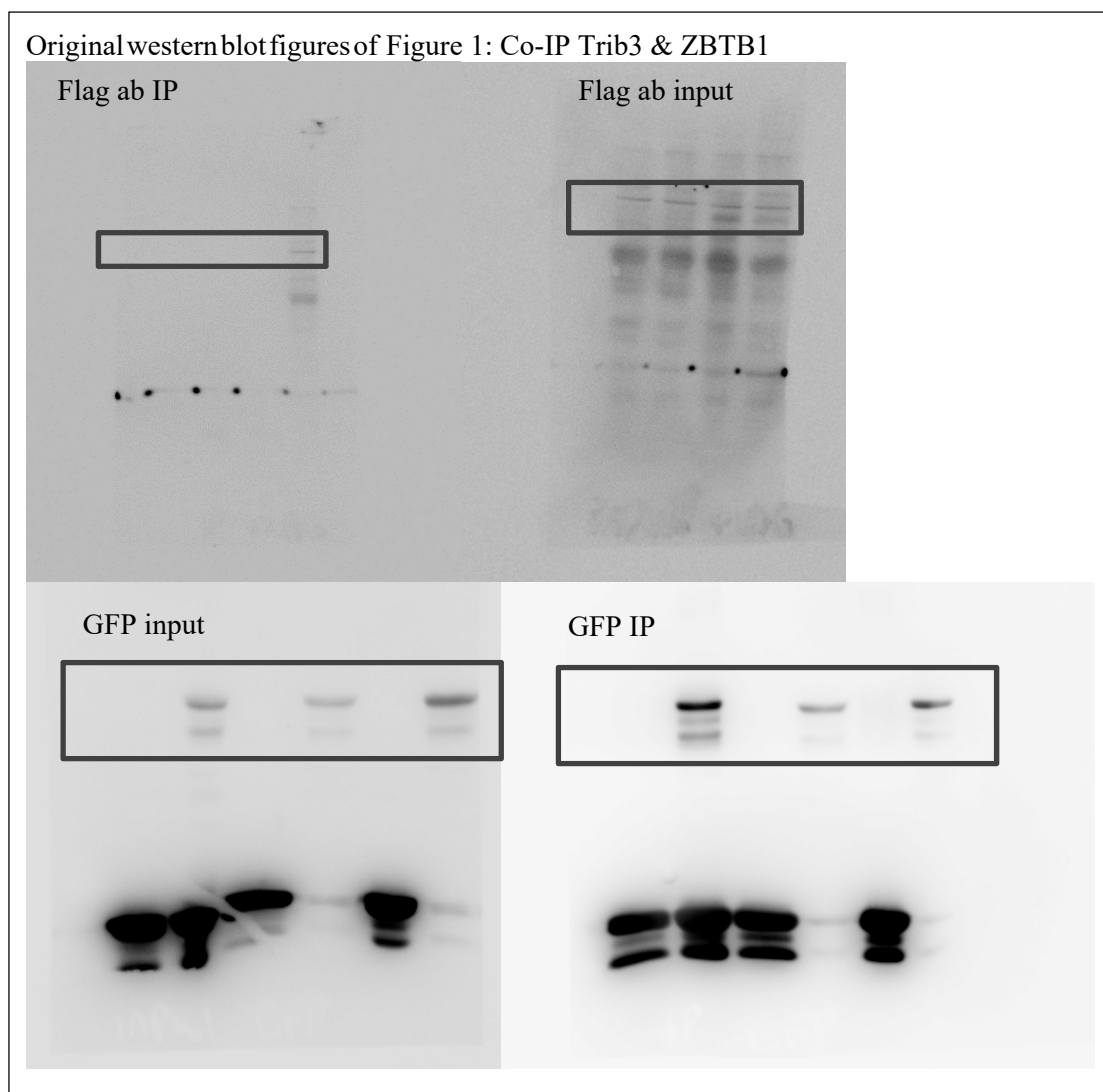

Original western blot figures of Figure 2: Gal4DBD & Tubulin ab

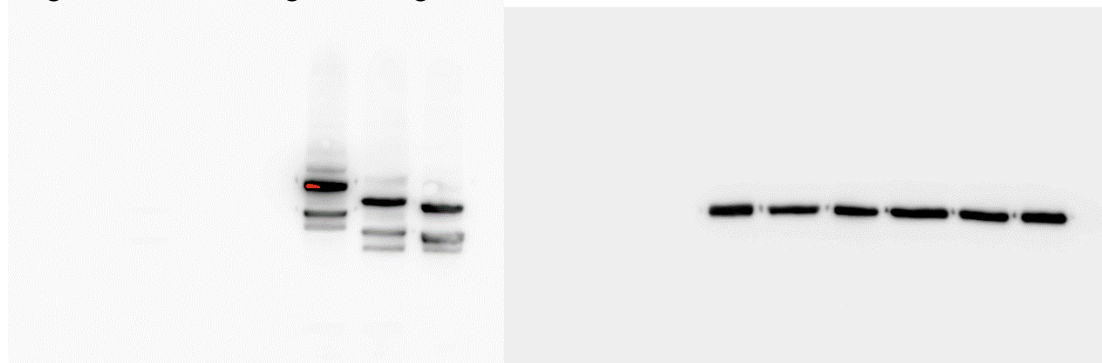

Original western blot figures of Figure 3: tGFP ab & tubulin MCF7

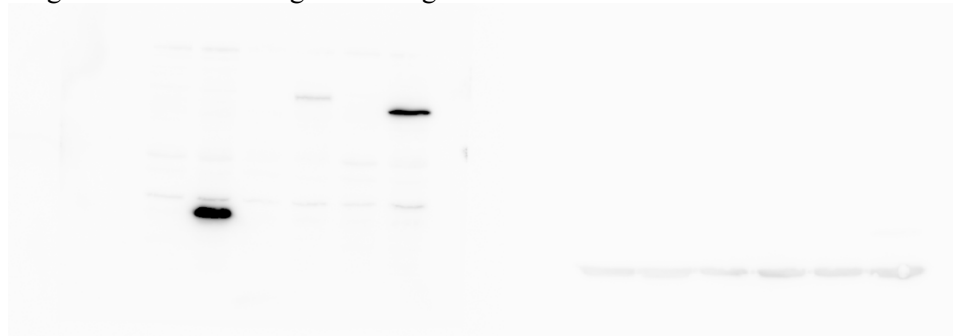

Supplement: s1 [file s1]
